# Supplementary material for: Excelling at DB2 Monitoring and Reporting.
Source: Royal Society of Chemistry journal article supplement (doi:10.1039/d0dt03429k), 2008-01-01
Supplement: d0dt03429k1.pdf [file d0dt03429k1.pdf]

## Supplementary Information

# Preferential phonon scattering and low energy carrier filtering by interfaces of *in-situ* formed InSb nanoprecipitates and GaSb nanoinclusions for enhanced thermoelectric performance in $\text{In}_{0.2}\text{Co}_4\text{Sb}_{12}$

Sanyukta Ghosh<sup>1</sup>, Gyan Shankar<sup>2</sup>, Anirudha Karati<sup>3</sup>, Gerda Rogl<sup>4</sup>, Peter Rogl<sup>4</sup>, Ernst Bauer<sup>5</sup>, B.S. Murty<sup>6</sup>, Satyam Suwas<sup>2</sup>, Ramesh Chandra Mallik<sup>1,\*</sup>

<sup>1</sup>Thermoelectric Materials and Devices Laboratory, Department of Physics, Indian Institute of Science, Bangalore 560012, India

<sup>2</sup>Department of Materials Engineering, Indian Institute of Science, Bangalore 560012, India

<sup>3</sup>Department of Chemistry, Indian Institute of Technology, Madras, Chennai-600036, India

<sup>4</sup>Institute of Materials Chemistry, University of Vienna, Währingerstrasse 42, 1090 Wien, Austria

<sup>5</sup>Institute of Solid State Physics, TU-Wien, Wiedner Hauptstrasse 8-10, 1040 Wien, Austria

<sup>6</sup>Department of Metallurgical and Materials Engineering, Indian Institute of Technology, Madras, Chennai-600036, India

\*Corresponding author's E-mail: rcmallik@iisc.ac.in

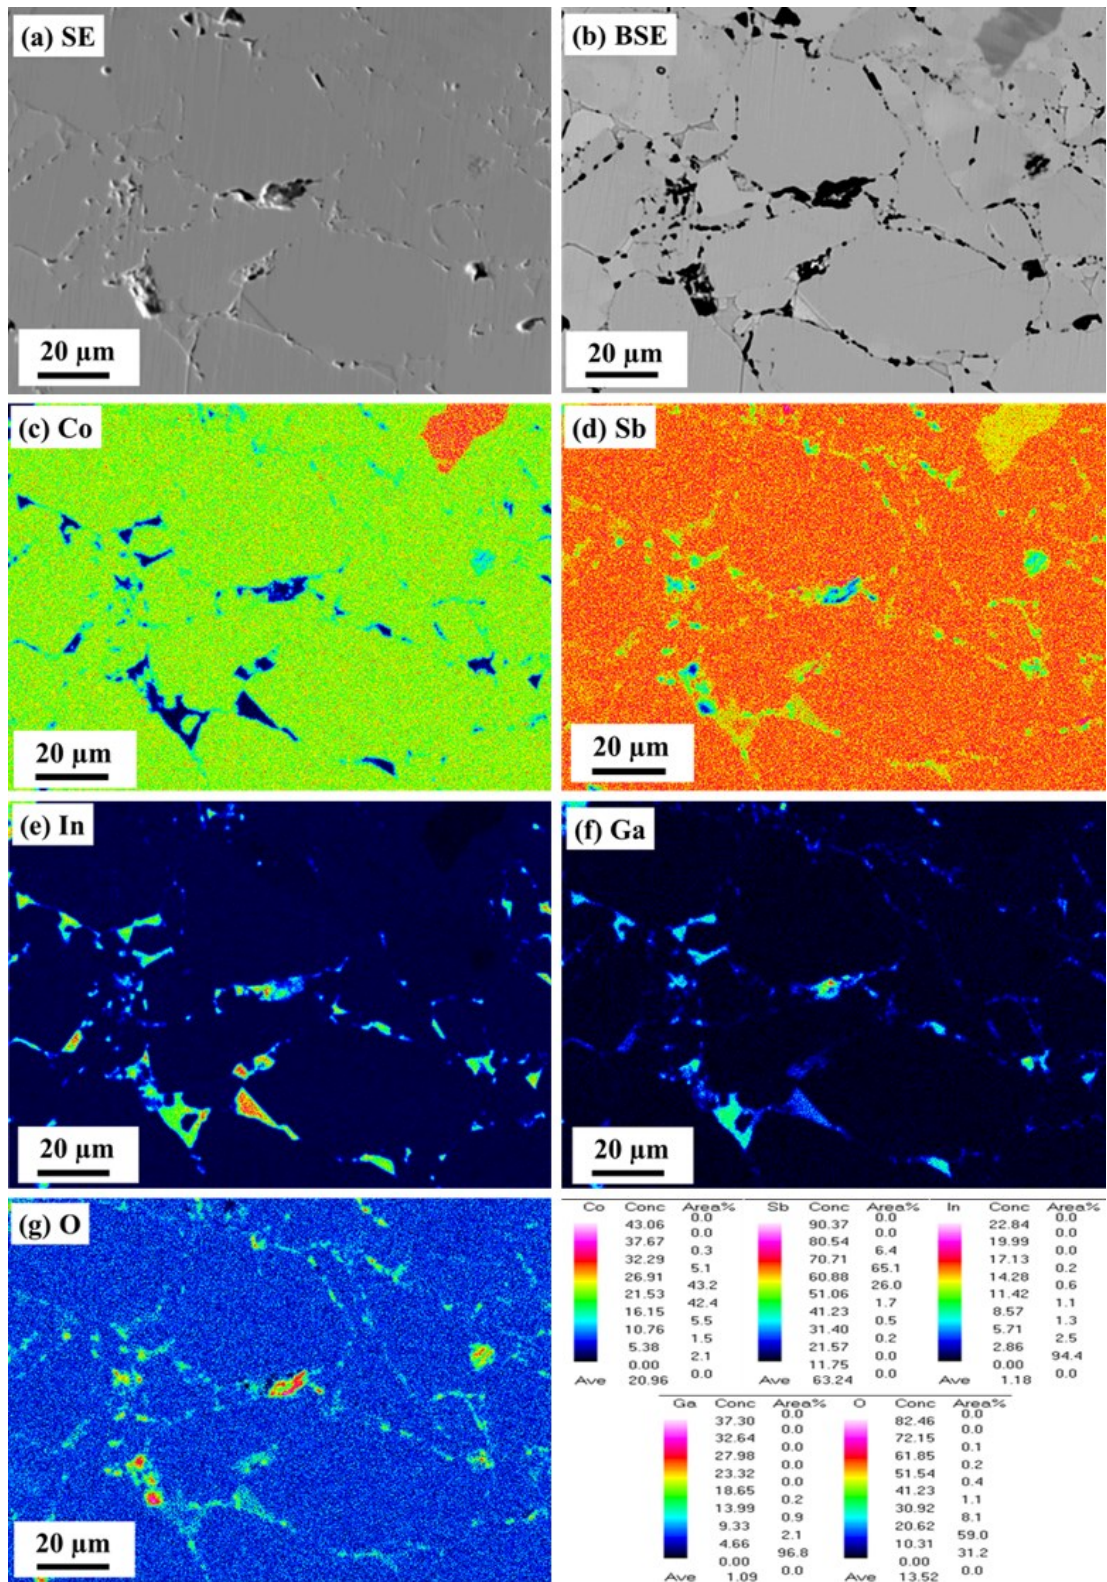

**Figure S1** (a)SE micrograph, (b) BSE micrograph of  $(\text{GaSb})_{0.2}+\text{In}_{0.2}\text{Co}_4\text{Sb}_{12}$ , EPMA-WDS elemental mapping of (c) Co, (d) Sb, (e) In, (f) Ga and (f) O.

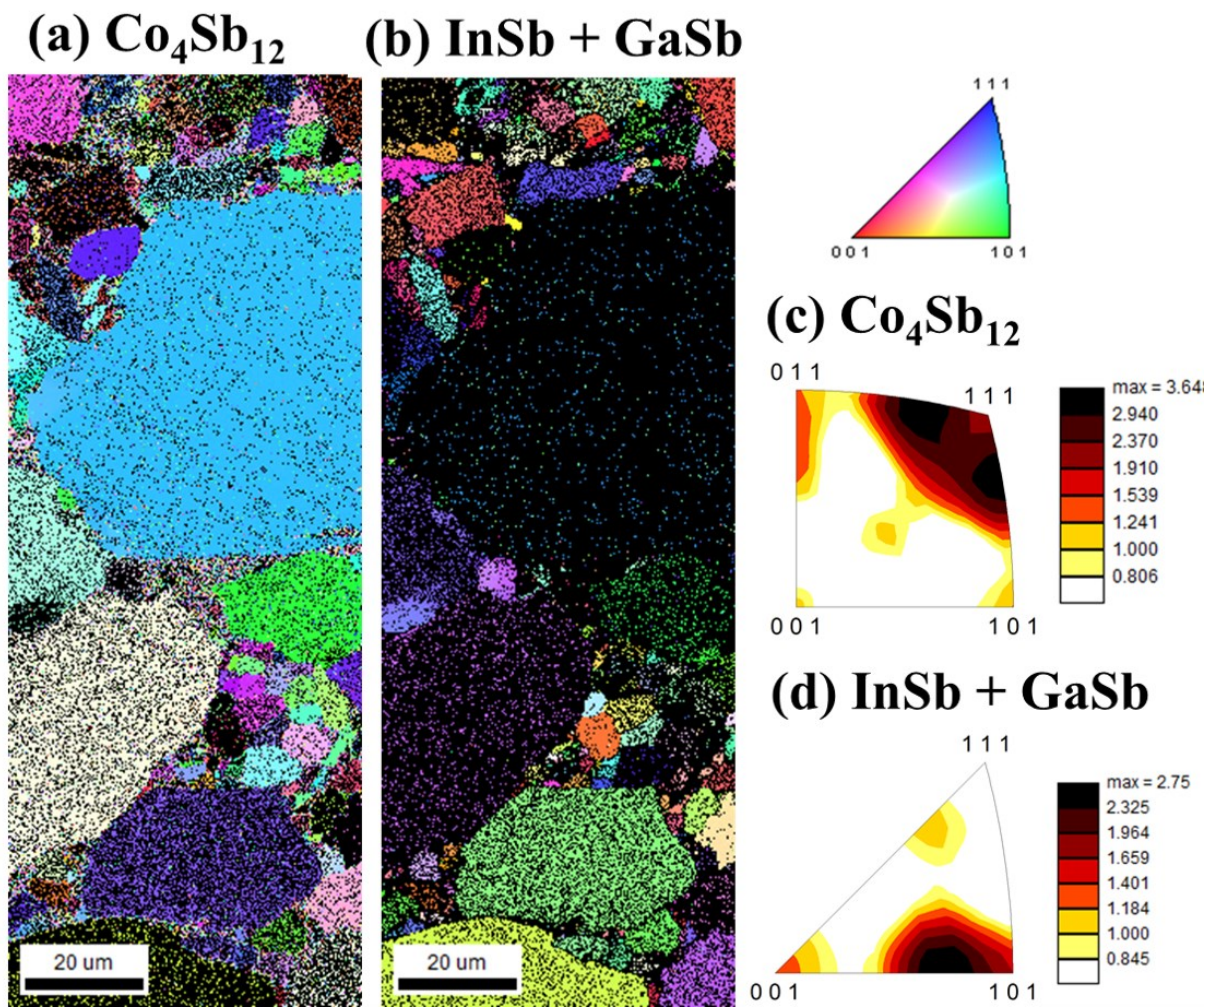

**Figure S2** Inverse pole figure (IPF) map of (a)  $\text{Co}_4\text{Sb}_{12}$ , (b) InSb and GaSb phase showing grain size and their distribution, normal direction (ND) IPF of (c)  $\text{Co}_4\text{Sb}_{12}$ , (d) GaSb and InSb phase of  $(\text{GaSb})_{0.1}+\text{In}_{0.2}\text{Co}_4\text{Sb}_{12}$ .

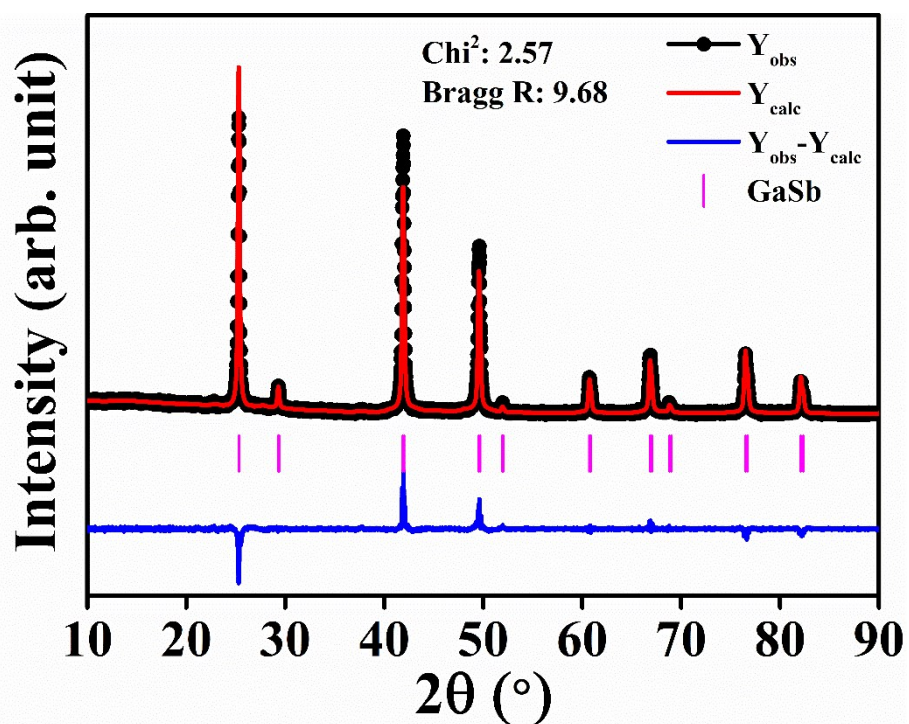

Figure S3 Rietveld refinement analysis of powder XRD pattern of ball-milled GaSb.

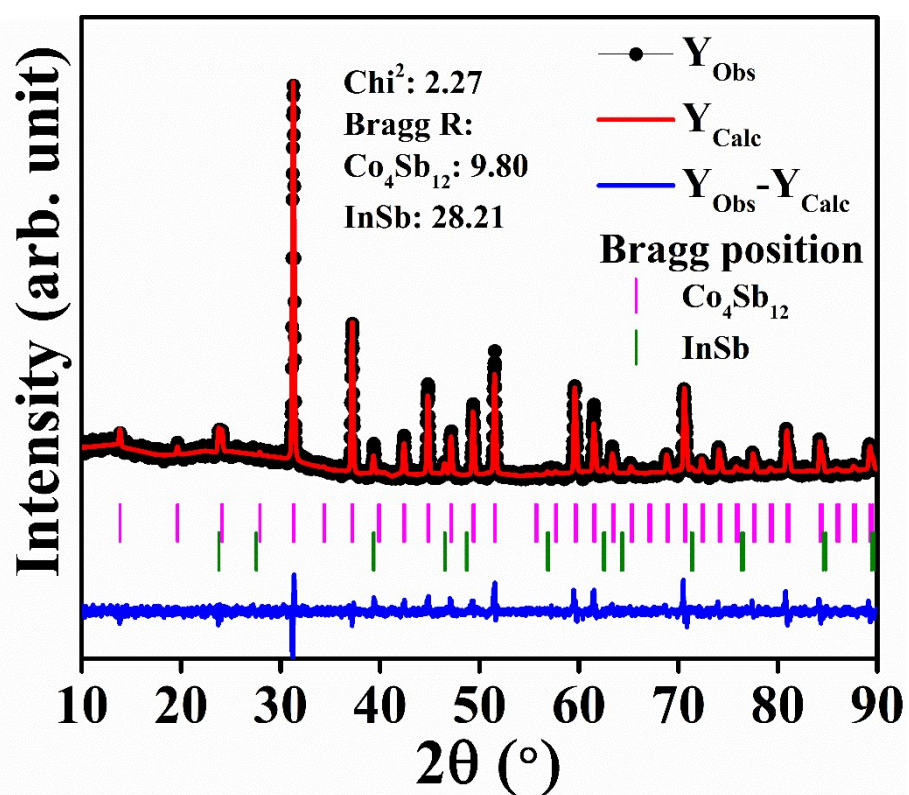

Figure S4 Rietveld refinement analysis of powder XRD pattern of In<sub>0.2</sub>Co<sub>4</sub>Sb<sub>12</sub>.

**Table S1** Rietveld refinement parameters of matrix  $\text{In}_{0.2}\text{Co}_4\text{Sb}_{12}$ .

| Atom | Wyckoff site | x    | y       | z       | $U_{\text{iso}}(\text{\AA}^2)$ | Normalized site occupancy |
|------|--------------|------|---------|---------|--------------------------------|---------------------------|
| Co   | 8c           | 0.25 | 0.25    | 0.25    | 0.009(1)                       | 1                         |
| Sb   | 24g          | 0    | 0.15(7) | 0.33(6) | 0.005(6)                       | 1                         |
| In   | 2a           | 0    | 0       | 0       | 0.029(5)                       | 0.24(9)                   |

The composition of the matrix from Rietveld refinement:  $\text{In}_{0.24(9)}\text{Co}_4\text{Sb}_{12}$ .

**Table S2** Rietveld refinement parameters of  $(\text{GaSb})_{0.1}+\text{In}_{0.2}\text{Co}_4\text{Sb}_{12}$ .

| Atom | Wyckoff site | x    | y       | z       | $U_{\text{iso}}(\text{\AA}^2)$ | Normalized site occupancy |
|------|--------------|------|---------|---------|--------------------------------|---------------------------|
| Co   | 8c           | 0.25 | 0.25    | 0.25    | 0.004(2)                       | 1                         |
| Sb   | 24g          | 0    | 0.15(7) | 0.33(5) | 0.006(3)                       | 0.97(3)                   |
| In   | 2a           | 0    | 0       | 0       | 0.068(1)                       | 0.26(4)                   |

The composition of the primary phase of the composite from Rietveld refinement:

$\text{In}_{0.26(4)}\text{Co}_4\text{Sb}_{11.67(9)}$ .

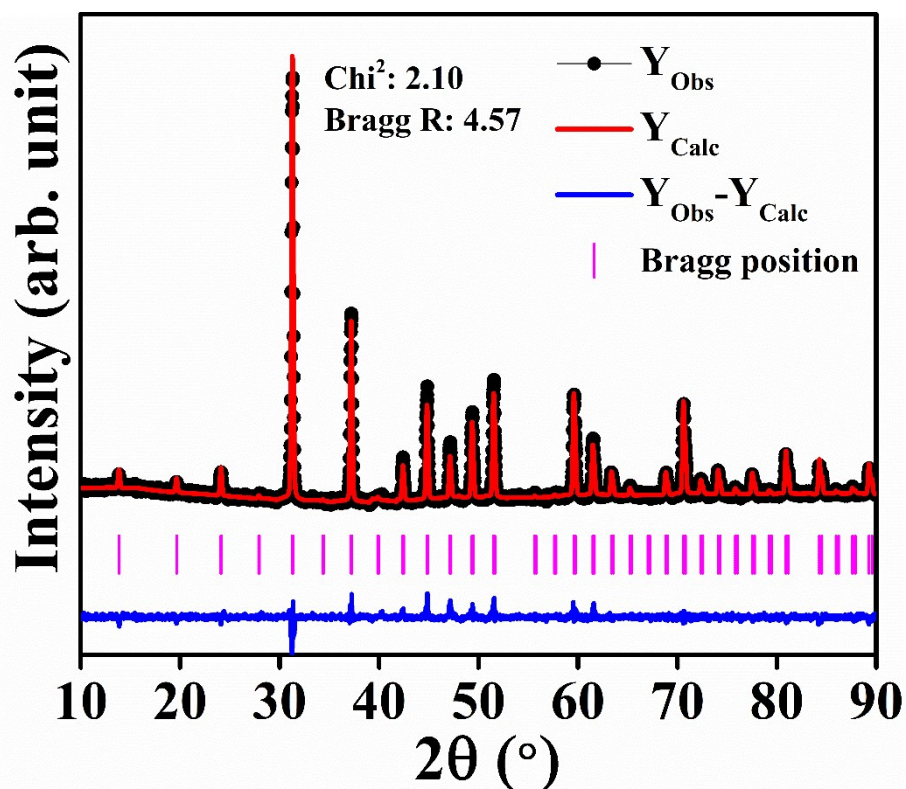**Figure S5** Rietveld refinement analysis of powder XRD pattern of  $(\text{GaSb})_{0.2}+\text{In}_{0.2}\text{Co}_4\text{Sb}_{12}$ .

**Table S3** Rietveld refinement parameters of  $(\text{GaSb})_{0.2}+\text{In}_{0.2}\text{Co}_4\text{Sb}_{12}$ .

| Atom | Wyckoff site | x    | y       | z       | $U_{\text{iso}}(\text{\AA}^2)$ | Normalized site occupancy |
|------|--------------|------|---------|---------|--------------------------------|---------------------------|
| Co   | 8c           | 0.25 | 0.25    | 0.25    | 0.006(1)                       | 1                         |
| Sb   | 24g          | 0    | 0.15(8) | 0.33(4) | 0.006(1)                       | 0.97(8)                   |
| In   | 2a           | 0    | 0       | 0       | 0.043(6)                       | 0.22(5)                   |

The composition of the primary phase of the composite from Rietveld refinement:

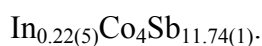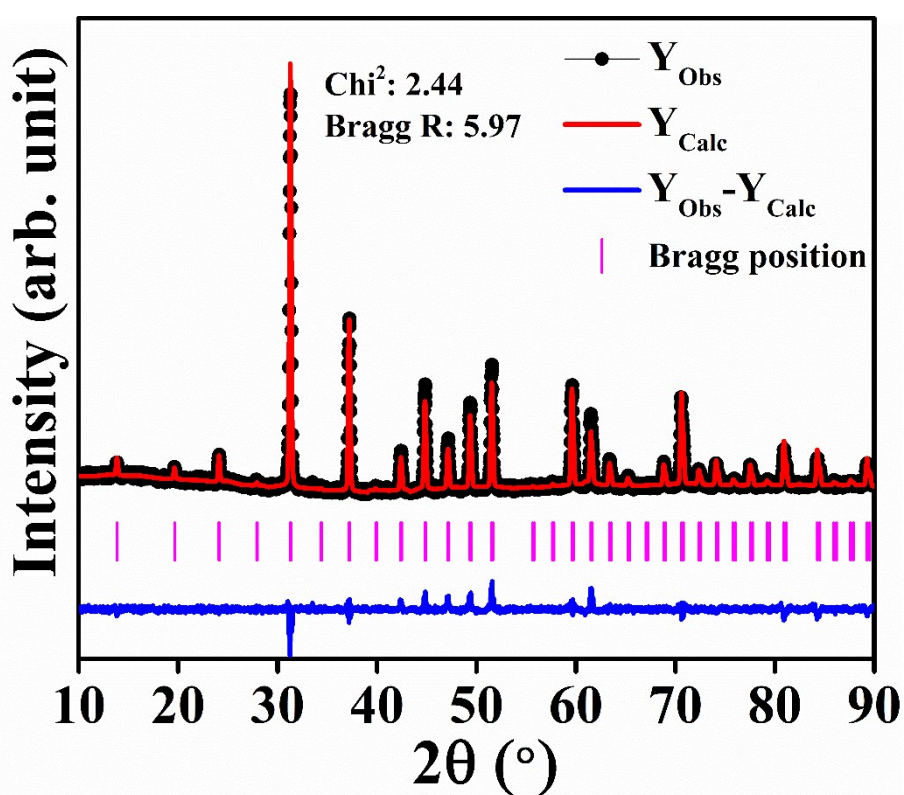**Figure S6** Rietveld refinement analysis of powder XRD pattern of  $(\text{GaSb})_{0.3}+\text{In}_{0.2}\text{Co}_4\text{Sb}_{12}$ .**Table S4** Rietveld refinement parameters of  $(\text{GaSb})_{0.3}+\text{In}_{0.2}\text{Co}_4\text{Sb}_{12}$ .

| Atom | Wyckoff site | x    | y       | z       | $U_{\text{iso}}(\text{\AA}^2)$ | Normalized site occupancy |
|------|--------------|------|---------|---------|--------------------------------|---------------------------|
| Co   | 8c           | 0.25 | 0.25    | 0.25    | 0.009(6)                       | 1                         |
| Sb   | 24g          | 0    | 0.15(7) | 0.33(5) | 0.005(3)                       | 0.99(1)                   |
| In   | 2a           | 0    | 0       | 0       | 0.015(9)                       | 0.23(5)                   |

The composition of the primary phase of the composite from Rietveld refinement:

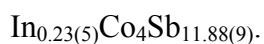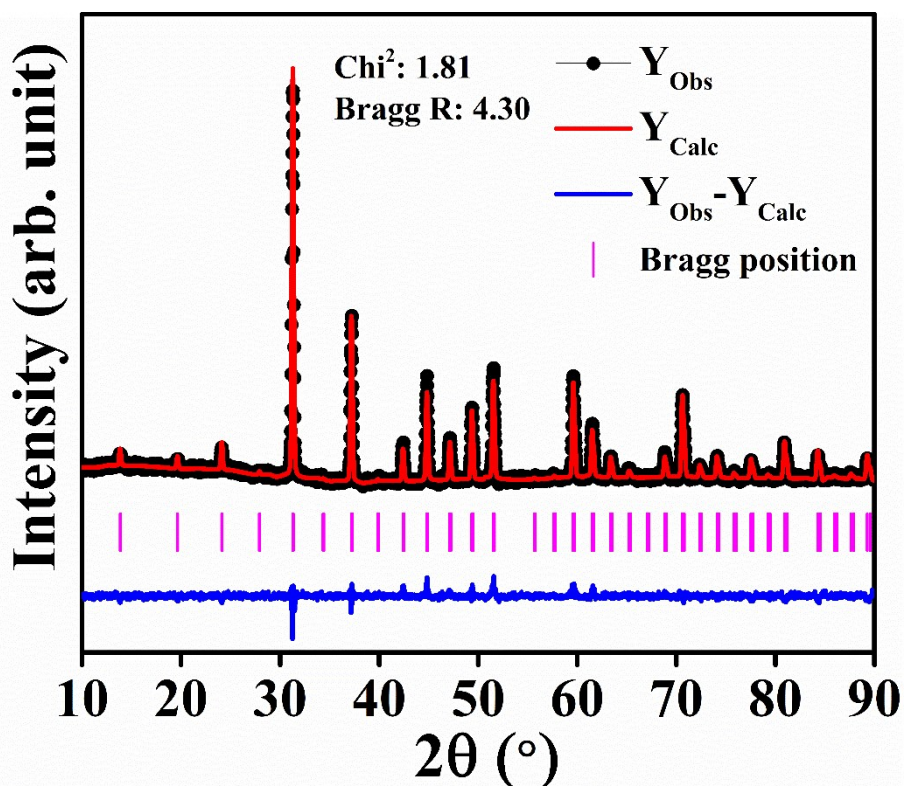

**Figure S7** Rietveld refinement analysis of powder XRD pattern of (GaSb)<sub>0.4</sub>+In<sub>0.2</sub>Co<sub>4</sub>Sb<sub>12</sub>.

**Table S5** Rietveld refinement parameters of (GaSb)<sub>0.4</sub>+In<sub>0.2</sub>Co<sub>4</sub>Sb<sub>12</sub>.

| Atom | Wyckoff site | x    | y       | z       | U <sub>iso</sub> (Å <sup>2</sup> ) | Normalized site occupancy |
|------|--------------|------|---------|---------|------------------------------------|---------------------------|
| Co   | 8c           | 0.25 | 0.25    | 0.25    | 0.007(5)                           | 1                         |
| Sb   | 24g          | 0    | 0.15(7) | 0.33(4) | 0.006(2)                           | 0.98(3)                   |
| In   | 2a           | 0    | 0       | 0       | 0.053(9)                           | 0.20(3)                   |

The composition of the primary phase of the composite from Rietveld refinement:

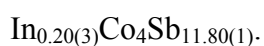

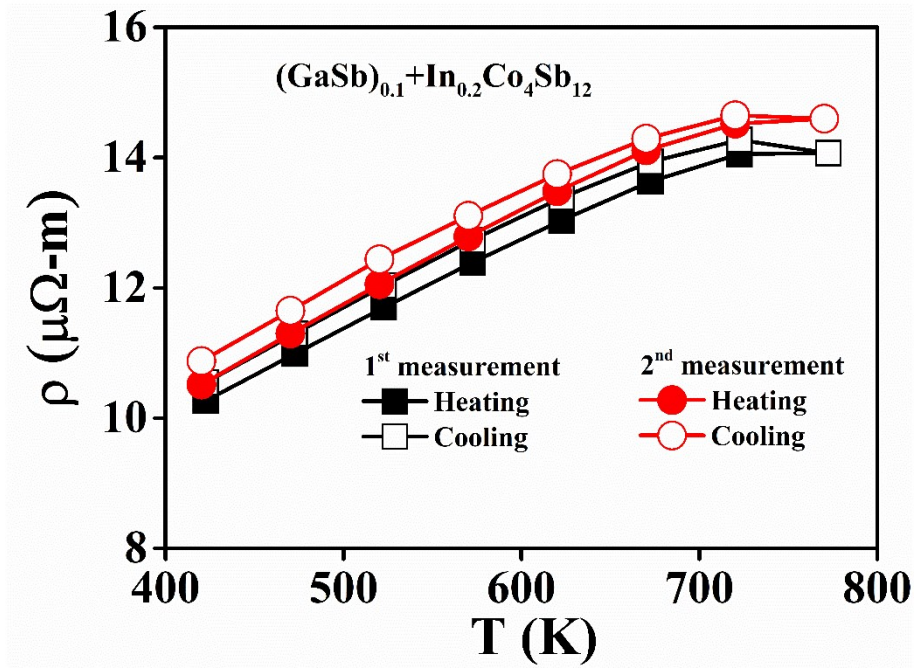

Figure S8 Temperature dependence of electrical resistivity of  $(\text{GaSb})_{0.1}+\text{In}_{0.2}\text{Co}_4\text{Sb}_{12}$ .

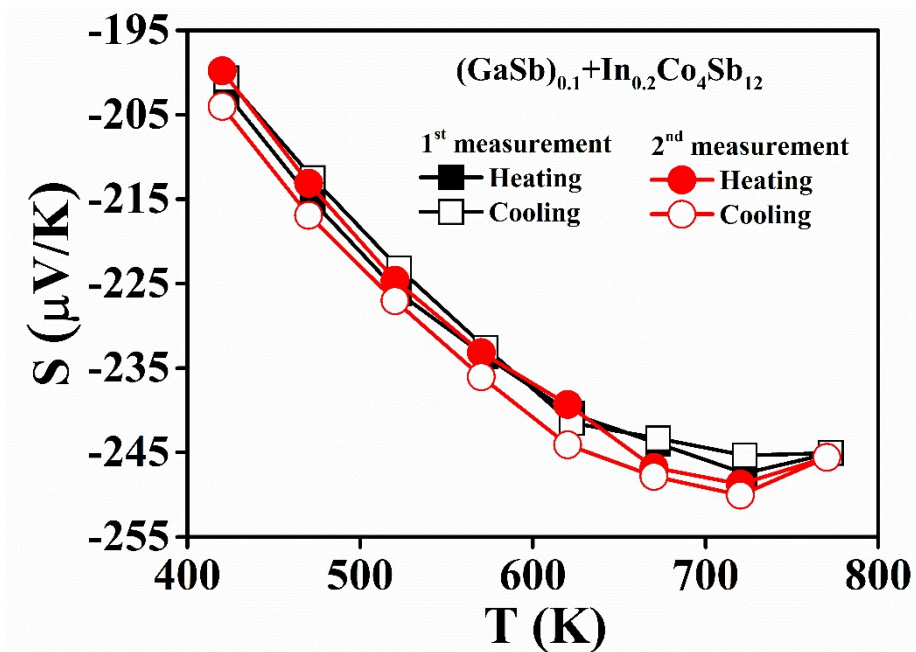

Figure S9 Temperature dependence of Seebeck coefficient of  $(\text{GaSb})_{0.1}+\text{In}_{0.2}\text{Co}_4\text{Sb}_{12}$ .



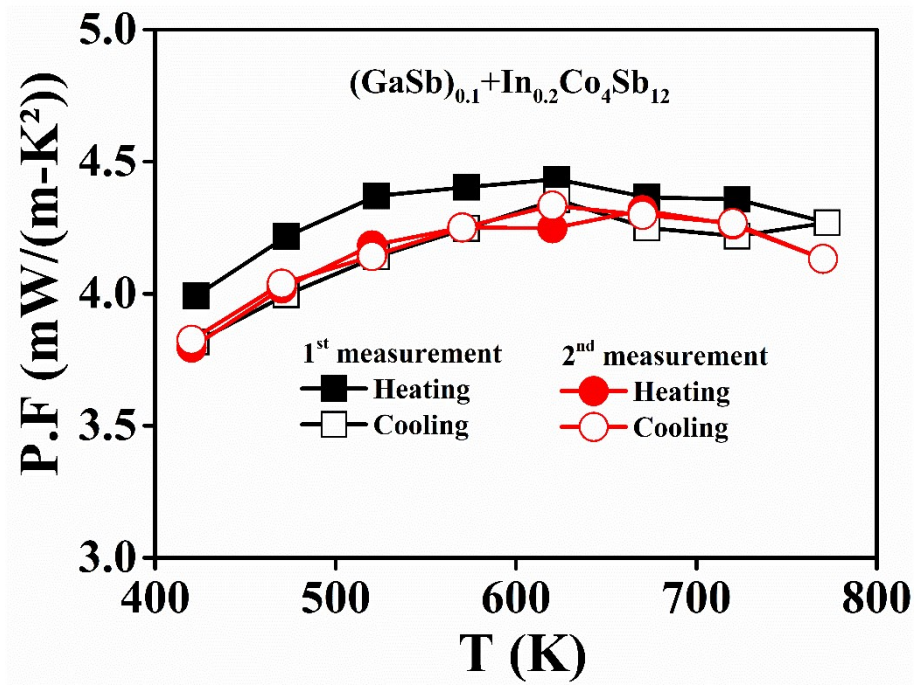

Figure S10 Temperature dependence of power factor of  $(\text{GaSb})_{0.1}+\text{In}_{0.2}\text{Co}_4\text{Sb}_{12}$ .
